# Supplementary material for: Highly Porous Carbon Materials Derived from Silicon Oxycarbides and Effect of the Pyrolysis Temperature on Their Electrochemical Response
Source: MDPI journal article supplement (doi:10.3390/ijms241813868), 2023-09-08
Supplement: s1 [file s1]

Supplementary information

# Highly porous carbon materials derived from silicon oxycarbides and effect of the pyrolysis temperature on their electrochemical response

Jose Merida<sup>1</sup>, Maria T. Colomer<sup>2</sup>, Fausto Rubio<sup>2</sup> and M. Alejandra Mazo <sup>2,\*</sup>

<sup>1</sup> Departamento de Ingeniería Química, Universidad Autónoma de Madrid, C/Tomás y Valiente 7, 28049 Madrid, Spain; josseantoniomerida@gmail.com (JM)

<sup>2</sup> Instituto de Cerámica y Vidrio, Consejo Superior de Investigaciones Científicas, C/Kelsen 5, 28049 Madrid, Spain; tcolomer@icv.csic.es (MTC), frubio@icv.csic.es (FR) and sandra@icv.csic.es (MAM)

\* Correspondence: sandra@icv.csic.es (MAM)

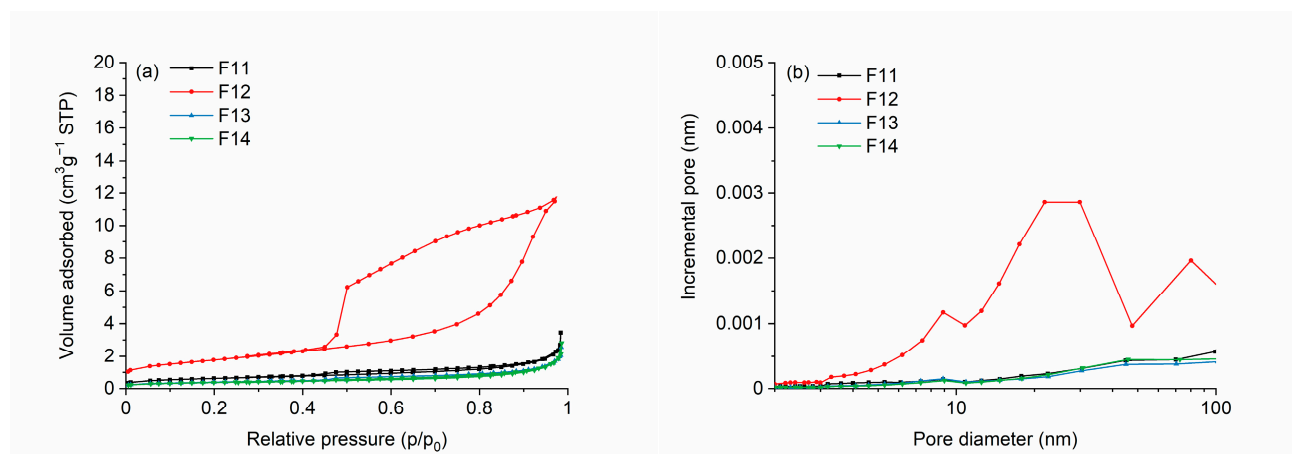

**Figure S1.** (a) N<sub>2</sub> adsorption-desorption isotherms and (b) pore size distribution of SiOC materials pyrolyzed at different temperatures.

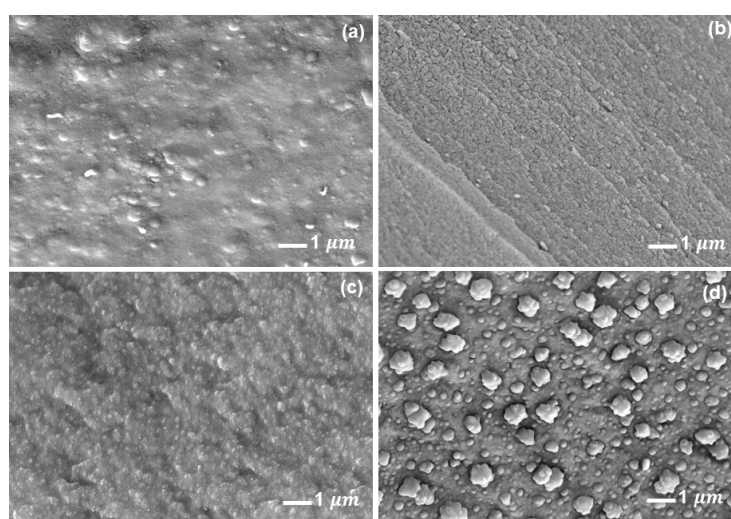

**Figure S2.** FE-SEM micrographs of SiOC pyrolyzed at different temperatures: (a) 1100 °C, (b) 1200 °C, (c) 1300 °C and (d) 1400 °C.

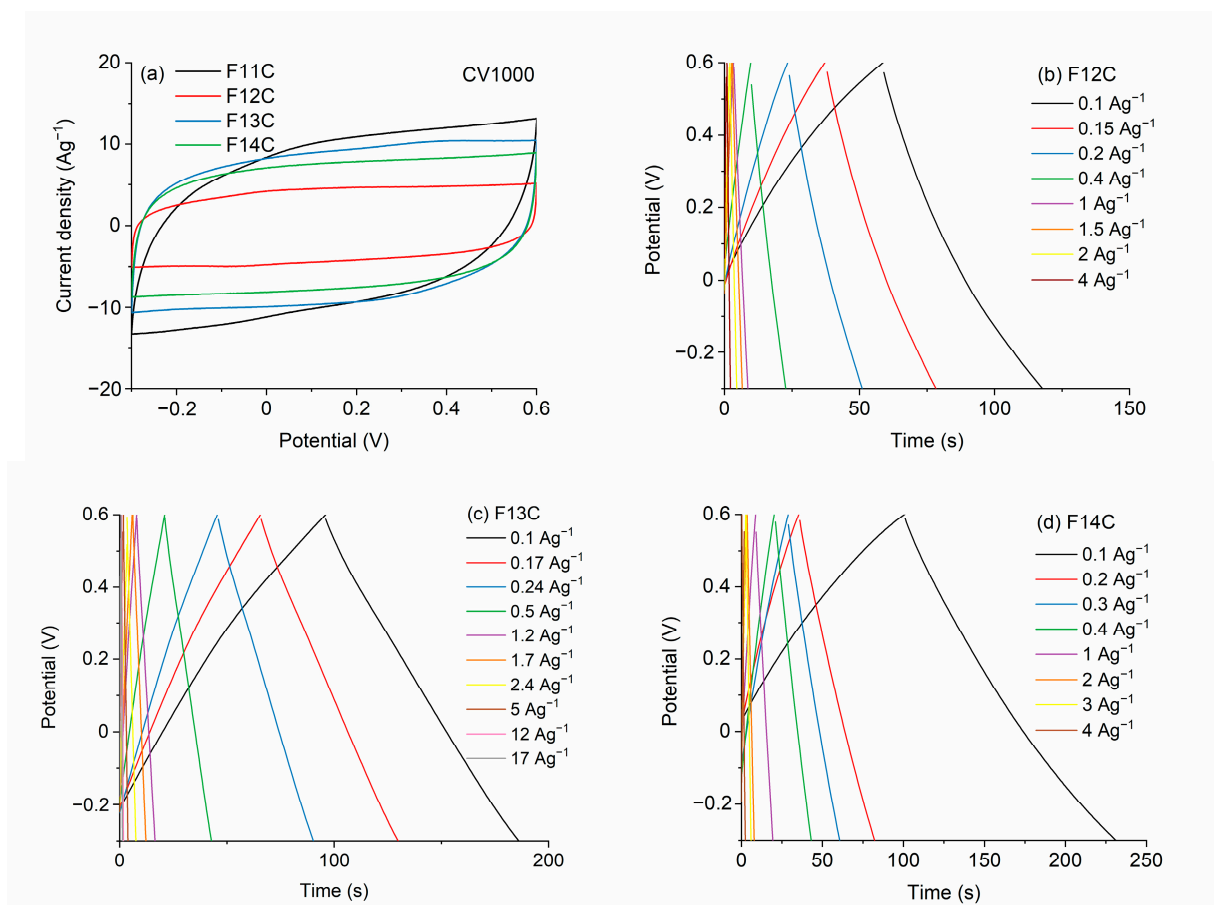

**Figure S3.** (a) CV curves at scan rate of 1000 mVs<sup>-1</sup> of SiOC-DC materials after Cl<sub>2</sub> etching pyrolyzed at different temperatures, GCD curves at different current densities of (b) F12C, (c) F13C and (d) F14C, respectively.

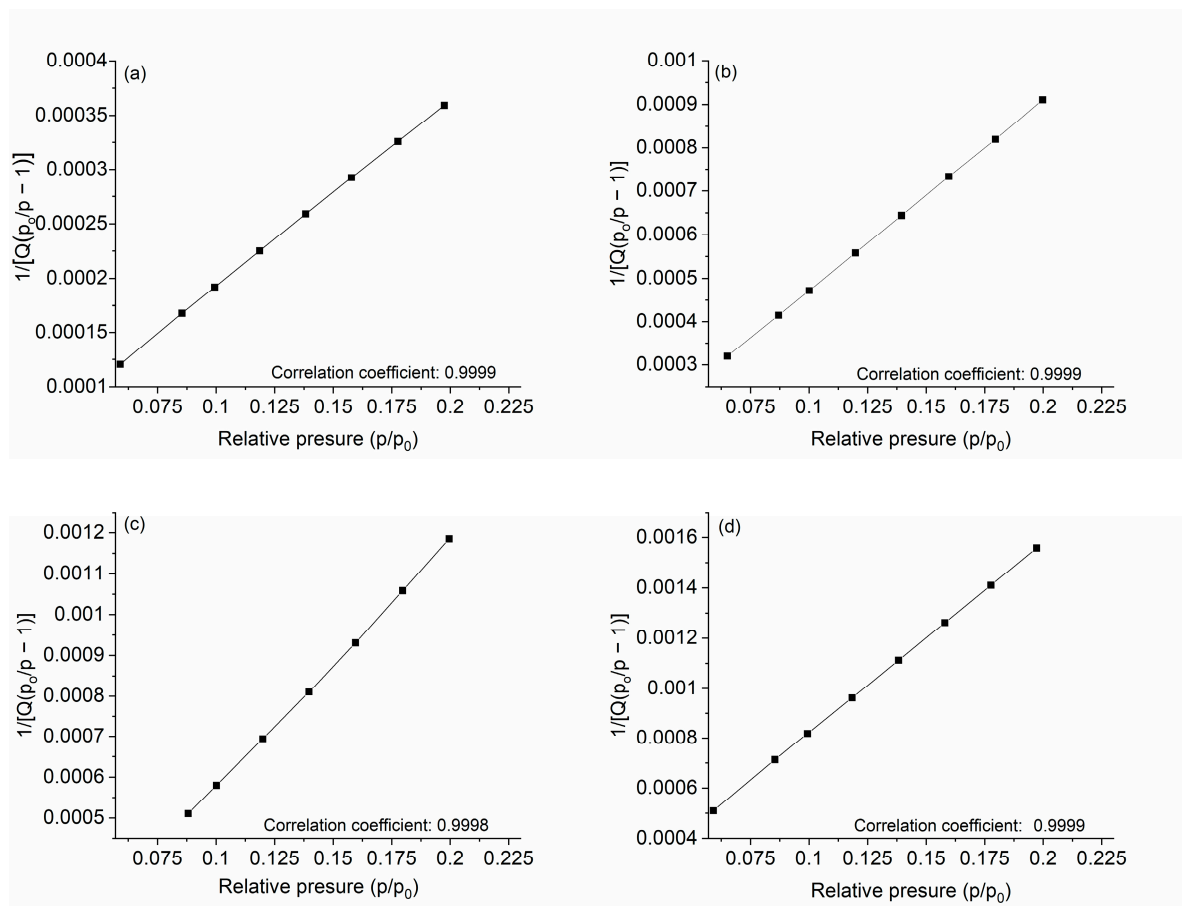

**Figure S4.** BET plots of SiOC-DC materials after  $\text{Cl}_2$  etching pyrolyzed at different temperatures (a) 1100 °C, (b) 1200 °C, (c) 1300 °C and (d) 1400 °C, respectively.
